# Supplementary material for: Embryo aggregation regulates in vitro stress conditions to promote developmental competence in pigs
Source: PeerJ. 2019 Dec 13;7:e8143. doi: 10.7717/peerj.8143 (PMC6913270; doi:10.7717/peerj.8143)
Supplement: Data S1 — Raw data applied for data analyses and preparation for Figure 3B, 3C, 3E and 3G; Figure 4B, 4D, 4E and 4G; Figure 5A, 5B and 5C; Figure 6A, 6B and 6C; Supplementary figure 1B, 1C, 1E and 1G. [file peerj-07-8143-s011.xlsx]

## Sheet: Figure 3
Figure 3B						Figure 3C							Figure 3E																					Figure 3G
RE	NC	1X	2X	3X		100 - 199 (um)	RE	NC	1X	2X	3X		NC					1X					2X					3X						NC				1X				2X				3X
1	60	53.3333	91.6667	85.7143			1	70	80	40	28.5714		number	ICM	TE	Total	ICM/TE	number	ICM	TE	Total	ICM/TE	number	ICM	TE	Total	ICM/TE	number	ICM	TE	Total	ICM/TE		number	total cell	apoptotic cell	apoptosis (%)	number	total cell	apoptotic cell	apoptosis (%)	number	total cell	apoptotic cell	apoptosis (%)	number	total cell	apoptotic cell	apoptosis (%)
2	65	70	83.3333	95			2	66.6667	72.7273	41.6667	33.3333		1	16	36	52	44.4444	1	17	36	53	47.2222	1	44	110	154	40	1	38	52	90	73.0769		1	55	3	5.45455	1	63	3	4.7619	1	165	4	2.42424	1	231	2	0.865801
3	61.9	66.6667	93.75	100			3	61.5385	72.7273	38.4615	29.4118		2	23	53	76	43.3962	2	14	35	49	40	2	47	106	153	44.3396	2	35	49	84	71.4286		2	54	2	3.7037	2	60	3	5	2	154	5	3.24675	2	219	3	1.36986
													3	13	33	46	39.3939	3	13	37	50	35.1351	3	33	105	138	31.4286	3	58	87	145	66.6667		3	52	2	3.84615	3	59	1	1.69492	3	79	3	3.79747	3	219	2	0.913242
						200 - 299 (um)	RE	NC	1X	2X	3X		4	14	45	59	31.1111	4	12	35	47	34.2857	4	49	88	137	55.6818	4	36	58	94	62.069		4	51	1	1.96078	4	53	1	1.88679	4	75	3	4	4	209	4	1.91388
							1	30	20	30	35.7143		5	11	36	47	30.5556	5	13	38	51	34.2105	5	40	87	127	45.977	5	69	127	196	54.3307		5	51	2	3.92157	5	47	3	6.38298	5	66	3	4.54545	5	196	4	2.04082
							2	25	27.2727	33.3333	33.3333		6	20	72	92	27.7778	6	9	27	36	33.3333	6	42	82	124	51.2195	6	28	52	80	53.8462		6	50	1	2	6	45	2	4.44444	6	64	2	3.125	6	191	2	1.04712
							3	30.7692	18.1818	30.7692	35.2941		7	10	46	56	21.7391	7	6	28	34	21.4286	7	30	94	124	31.9149	7	30	56	86	53.5714		7	50	2	4	7	44	1	2.27273	7	64	2	3.125	7	178	3	1.68539
													8	13	62	75	20.9677	8	6	36	42	16.6667	8	29	92	121	31.5217	8	32	60	92	53.3333		8	47	2	4.25532	8	42	2	4.7619	8	144	4	2.77778	8	165	2	1.21212
						≥ 300 (um)	RE	NC	1X	2X	3X		9	14	78	92	17.9487	9	11	67	78	16.4179	9	27	80	107	33.75	9	28	59	87	47.4576		9	45	2	4.44444	9	42	1	2.38095	9	133	4	3.00752	9	161	3	1.86335
							1	0	0	30	35.7143		10	13	29	42	44.8276	10	8	76	84	10.5263	10	18	77	95	23.3766	10	52	113	165	46.0177		10	45	2	4.44444	10	26	1	3.84615	10	131	2	1.52672	10	153	3	1.96078
							2	8.33333	0	25	33.3333		11	8	28	36	28.5714	11	20	67	87	29.8507	11	30	64	94	46.875	11	42	92	134	45.6522		11	39	1	2.5641	11	42	1	2.38095	11	125	3	2.4	11	148	2	1.35135
							3	7.69231	9.09091	30.7692	35.2941		12	9	31	40	29.0323	12	11	22	33	50	12	18	76	94	23.6842	12	46	103	149	44.6602		12	37	2	5.40541	12	53	2	3.77358	12	103	4	3.8835	12	145	2	1.37931
													13	9	24	33	37.5	13	12	60	72	20	13	20	68	88	29.4118	13	34	77	111	44.1558		13	35	1	2.85714	13	42	2	4.7619	13	101	1	0.990099	13	142	2	1.40845
													14	10	32	42	31.25	14	13	38	51	34.2105	14	25	54	79	46.2963	14	39	93	132	41.9355		14	34	1	2.94118	14	53	2	3.77358	14	85	1	1.17647	14	131	3	2.29008
													15	15	43	58	34.8837	15	15	39	54	38.4615	15	24	44	68	54.5455	15	25	66	91	37.8788		15	39	2	5.12821	15	42	2	4.7619	15	84	2	2.38095	15	120	1	0.833333
													16	12	32	44	37.5	16	12	40	52	30	16	21	41	62	51.2195	16	33	90	123	36.6667										16	82	4	4.87805	16	118	2	1.69492
													17	15	60	75	25						17	10	59	69	16.9492	17	33	90	123	36.6667														17	116	2	1.72414
																							18	12	73	85	16.4384	18	52	142	194	36.6197														18	115	1	0.869565
																							19	51	106	157	48.1132	19	48	138	186	34.7826														19	106	1	0.943396
																												20	43	125	168	34.4														20	249	2	0.803213
																												21	29	94	123	30.8511														21	241	2	0.829876
																												22	29	101	130	28.7129														22	239	2	0.83682
																												23	33	125	158	26.4														23	150	2	1.33333

## Sheet: Figure 4
Figure 4B				Figure 4D				Figure 4E				Figure 4G
number	1X	3X		number	1X	3X		number	1X	3X		1X				3X
1	66.465	54.034		1	1.212	3.36		1	1	2.9897		number	green	red	red/green	number	green	red	red/green
2	66.135	49.712		2	1.2	3.352		2	1	2.75108		1	2.713	2.629	0.969038	1	5.088	8.392	1.64937
3	63.619	44.243		3	1.1	3.12		3	1	2.79067		2	3.462	2.757	0.79636	2	5.64	9.091	1.61188
4	63.051	44.233		4	1.09	3.02						3	6.023	4.668	0.775029	3	5.621	8.824	1.56983
5	58.432	40.795		5	1.086	2.95						4	4.791	3.353	0.699854	4	5.507	8.425	1.52987
6	58.349	40.534		6	1.084	2.8062						5	4.888	3.387	0.692921	5	4.925	6.582	1.33645
7	57.985	40.182		7	1.065	2.62						6	6.99	4.52	0.646638	6	6.876	9.12	1.32635
8	51.821	37.678		8	1.0548	2.5362						7	4.58	2.956	0.645415	7	10.241	13.521	1.32028
9	50.883	36.977		9	1.02	2.5						8	3.864	2.423	0.62707	8	5.322	7	1.3153
10	49.233	34.377		10	1.0116	2.408						9	4.107	2.545	0.619674	9	6.606	8.516	1.28913
11	48.486	33.894		11	1	2.3508						10	4.503	2.783	0.618032	10	8.952	11.254	1.25715
12	44.777	33.283		12	0.991	2.265						11	2.791	1.652	0.591903	11	7.456	9.237	1.23887
13	41.148	29.867		13	0.8	2.23						12	4.102	2.347	0.57216	12	6.155	7.591	1.23331
14	39.818	29.204		14	0.8	2.195						13	4.186	2.358	0.563306	13	6.368	7.432	1.16709
15	39.727	28.17		15	0.786	2.15						14	2.632	1.363	0.517857	14	7.505	8.735	1.16389
16	38.756	26.905		16	0.78	2.139						15	3.188	1.631	0.511606	15	7.794	8.449	1.08404
17	35.745	26.799		17	0.757	2.119						16	6.33	2.193	0.346445	16	8.515	9.229	1.08385
18	34.347	23.665
19	33.089	20.959
20	31.948	18.321

## Sheet: Figure 5
Figure 5A				Figure 5B				Figure 5C
ATF4				SOD1				TFAM
number	1X	3X		number	1X	3X		number	1X	3X
1	1	0.817902		1	1	1.28		1	1	1.93
2	1	0.835088		2	1	1.26		2	1	1.73
3	1	0.907519		3	1	1.1		3	1	1.69
CHOP				SOD2				POLG
number	1X	3X		number	1X	3X		number	1X	3X
1	1	0.356013		1	1	1.83		1	1	4.38
2	1	0.476319		2	1	1.6		2	1	3.92
3	1	0.493116		3	1	1.56		3	1	3.58
IRE1				Catalase				POLG2
number	1X	3X		number	1X	3X		number	1X	3X
1	1	0.243164		1	1	2.57		1	1	1.54
2	1	0.260616		2	1	2.45		2	1	1.41
3	1	0.63728		3	1	2.36		3	1	1.4

## Sheet: Figure 6
Figure 6A				Figure 6B				Figure 6C
Oct4				Bax				VEGF
number	1X	3X		number	1X	3X		number	1X	3X
1	1	1.92		1	1	0.92		1	1	1.22
2	1	1.91		2	1	0.99		2	1	1.16
3	1	1.66		3	1	1.06		3	1	1.15
Sox2				Bak				IFNG
number	1X	3X		number	1X	3X		number	1X	3X
1	1	2.06		1	1	0.67		1	1	6.45
2	1	1.96		2	1	0.73		2	1	5.82
3	1	1.68		3	1	0.75		3	1	5.28
Nanog				Bcl-xl				LIF
number	1X	3X		number	1X	3X		number	1X	3X
1	1	2.79		1	1	4		1	1	2.59
2	1	2.46		2	1	3.92		2	1	2.35
3	1	2.46		3	1	3.51		3	1	2.46
Cdx2				Bcl2
number	1X	3X		number	1X	3X
1	1	1.95		1	1	3.51
2	1	1.92		2	1	3.39
3	1	1.47		3	1	3.29

## Sheet: Supplementary Figure 1
Supplementary Figure 1B				Supplementary Figure 1C					Supplementary Figure 1E											Supplementary Figure 1G
RE	1X	3X		100 - 199 (um)	RE	1X	3X		1X					3X						1X				3X
1	64.5	83.9			1	38.9	20		number	ICM	TE	Total	ICM/TE	number	ICM	TE	Total	ICM/TE		number	total cell	apoptotic cell	apoptosis (%)	number	total cell	apoptotic cell	apoptosis (%)
2	60	80			2	44.4	13.3		1	29	78	107	37.1795	1	114	191	305	59.6859		1	73	5	6.84932	1	172	5	2.90698
3	58.9	89.1			3	30.4	10.7		2	28	77	105	36.3636	2	104	164	268	63.4146		2	107	4	3.73832	2	142	4	2.8169
									3	25	79	104	31.6456	3	103	195	298	52.8205		3	74	4	5.40541	3	159	4	2.51572
				200 - 299 (um)	RE	1X	3X		4	27	72	99	37.5	4	86	146	232	58.9041		4	56	4	7.14286	4	240	6	2.5
					1	50	40		5	23	69	92	33.3333	5	83	137	220	60.5839		5	109	3	2.75229	5	170	4	2.35294
					2	44.4	36.7		6	20	68	88	29.4118	6	82	146	228	56.1644		6	96	3	3.125	6	171	4	2.33918
					3	56.5	42.9		7	23	63	86	36.5079	7	82	201	283	40.796		7	85	3	3.52941	7	178	4	2.24719
									8	20	66	86	30.303	8	82	233	315	35.1931		8	64	3	4.6875	8	194	4	2.06186
				≥ 300 (um)	RE	1X	3X		9	18	64	82	28.125	9	81	140	221	57.8571		9	62	3	4.83871	9	245	5	2.04082
					1	11.1	40		10	26	51	77	50.9804	10	80	166	246	48.1928		10	59	3	5.08475	10	199	4	2.01005
					2	11.1	50		11	20	55	75	36.3636	11	75	223	298	33.6323		11	56	3	5.35714	11	171	3	1.75439
					3	13	46.4		12	18	51	69	35.2941	12	70	101	171	69.3069		12	91	2	2.1978	12	233	4	1.71674
									13	23	44	67	52.2727	13	66	127	193	51.9685		13	76	2	2.63158	13	305	5	1.63934
									14	18	49	67	36.7347	14	65	152	217	42.7632		14	65	2	3.07692	14	201	3	1.49254
									15	13	52	65	25	15	65	158	223	41.1392		15	59	2	3.38983	15	209	3	1.43541
									16	13	51	64	25.4902	16	65	164	229	39.6341		16	59	2	3.38983	16	288	4	1.38889
									17	17	46	63	36.9565	17	60	195	255	30.7692		17	49	2	4.08163	17	226	3	1.32743
									18	14	48	62	29.1667	18	57	158	215	36.0759		18	49	2	4.08163	18	151	2	1.3245
									19	12	43	55	27.907	19	56	103	159	54.3689		19	94	1	1.06383	19	231	3	1.2987
									20	12	37	49	32.4324	20	52	198	250	26.2626		20	94	1	1.06383	20	267	3	1.1236
									21	13	33	46	39.3939	21	51	113	164	45.1327		21	68	1	1.47059	21	186	2	1.07527
														22	44	134	178	32.8358		22	65	1	1.53846	22	287	3	1.0453
														23	42	115	157	36.5217		23	115	0	0	23	299	3	1.00334
														24	72	159	231	45.283		24	101	0	0	24	205	2	0.97561
																				25	79	0	0	25	151	1	0.662252
																								26	310	2	0.645161
																								27	220	1	0.454545
																								28	244	1	0.409836
																								29	298	1	0.33557
